# Supplementary material for: Near-infrared-emitting AIE multinuclear cationic Ir(iii) complex-assembled nanoparticles for photodynamic therapy
Source: Royal Society of Chemistry journal article supplement (doi:10.1039/d0dt02962a), 2020-01-01
Supplement: d0dt02962a1.pdf [file d0dt02962a1.pdf]

## Electronic supplementary information

### **Near-Infrared emitting AIE multinuclear cationic Ir(III) complexes assembled nanoparticles for photodynamic therapy**

Lijuan Li,<sup>‡a</sup> Liping Zhang,<sup>‡a</sup> Xiaofan Tong,<sup>a</sup> Yite Li,<sup>b</sup> Zhiyu Yang,<sup>b</sup> Dongxia Zhu,<sup>\*a</sup> Zhongmin Su,<sup>\*a</sup> Zhigang Xie<sup>\*b</sup>

*<sup>a</sup> Key Laboratory of Nanobiosensing and Nanobioanalysis at Universities of Jilin Province, Department of Chemistry, Northeast Normal University, 5268 Renmin Street, Changchun, Jilin Province 130024, P. R. China. E-mail: zhudx047@nenu.edu.cn; zmsu@nenu.edu.cn*

*<sup>b</sup> State Key Laboratory of Polymer Physics and Chemistry, Changchun Institute of Applied Chemistry Chinese Academy of Sciences, Changchun 130022, P. R. China. E-mail: xiez@ciac.ac.cn*

## Supplementary Figures and Tables

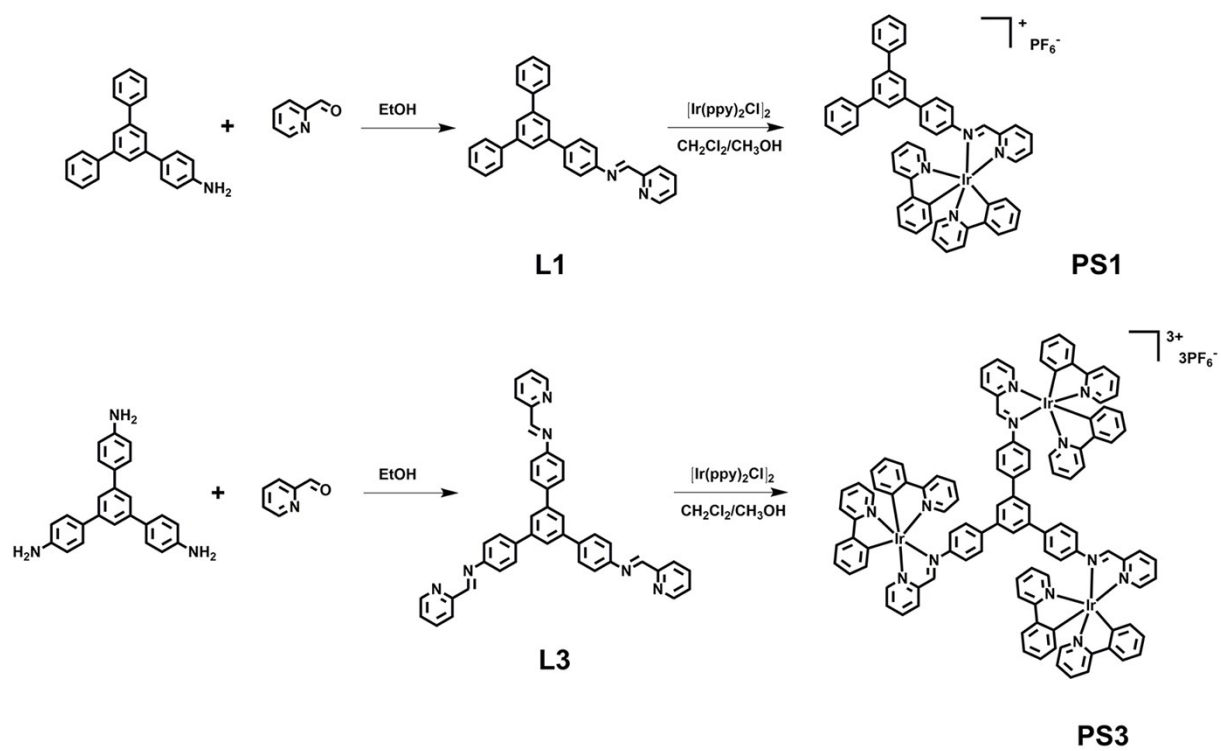

**Scheme S1** Synthetic routes of **L1**, **L3**, **PS1** and **PS3**.

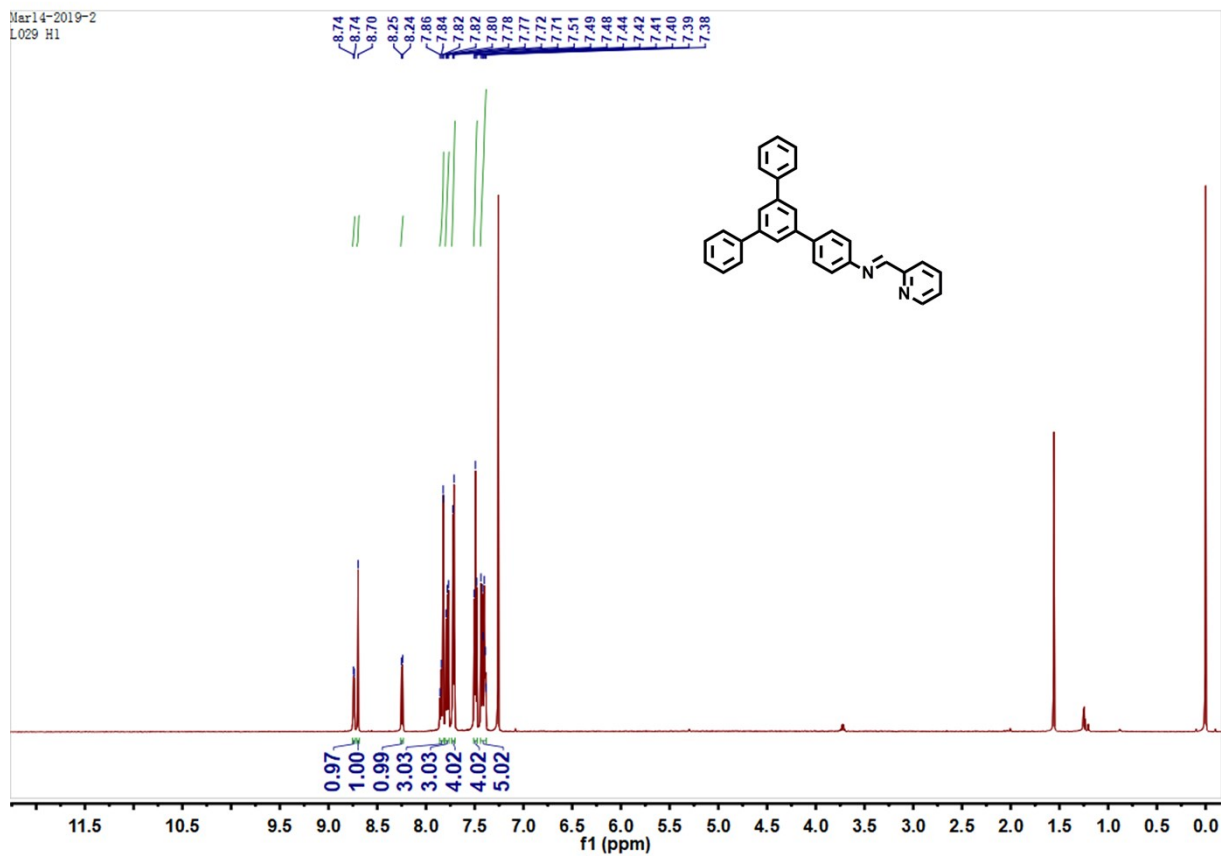

Fig. S1  $^1\text{H}$  NMR spectrum of **L1** in  $\text{CDCl}_3$ .



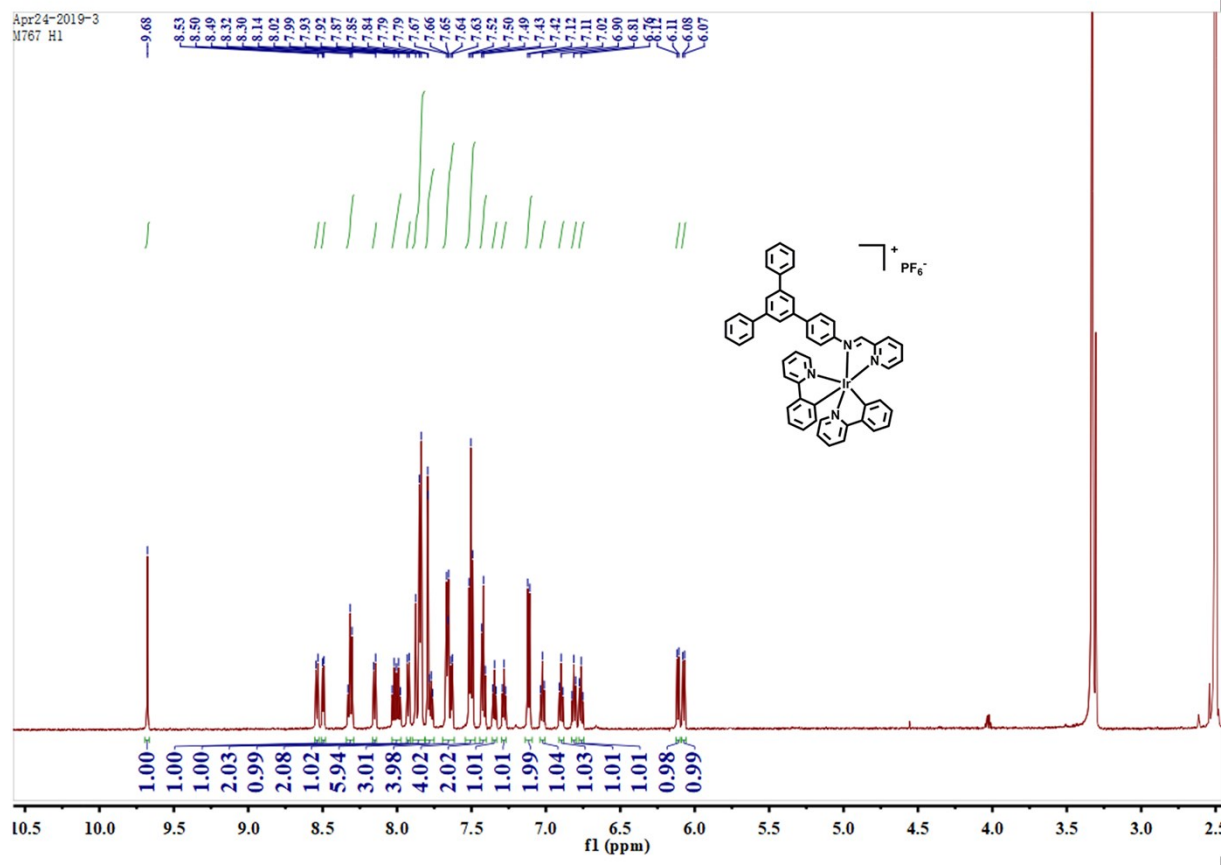

Fig. S3  $^1\text{H}$  NMR spectrum of PS1 in  $\text{DMSO-}d_6$ .

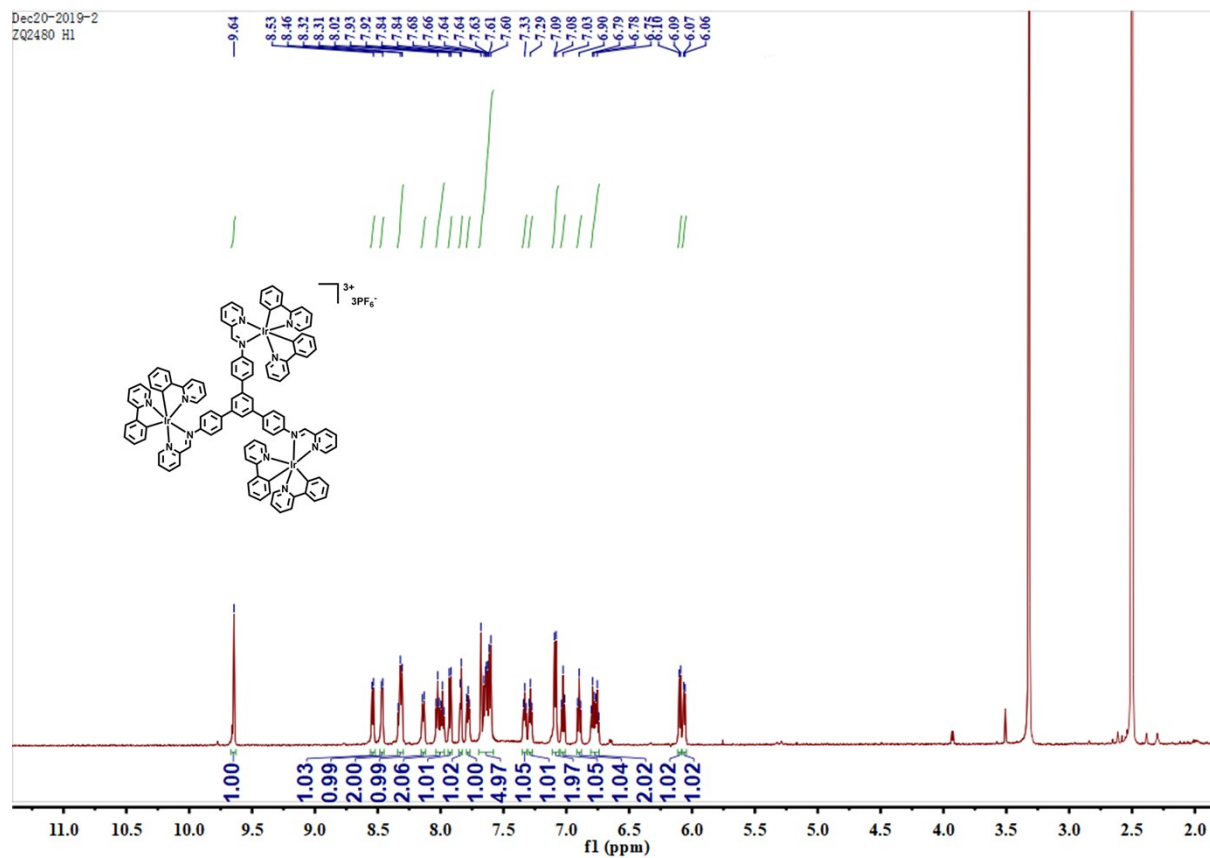

Fig. S4  $^1H$  NMR spectrum of PS3 in DMSO- $d_6$ .

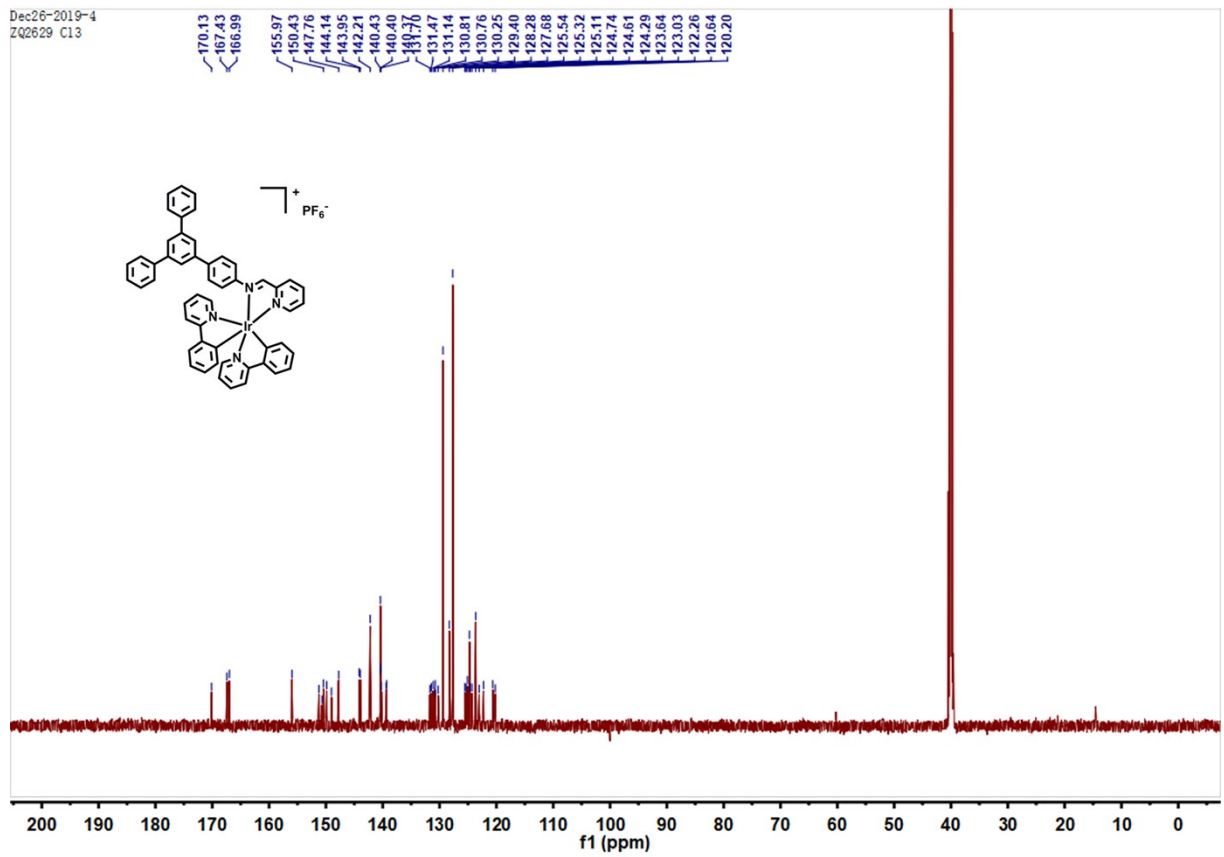

Fig. S5  $^{13}\text{C}$  NMR spectrum of PS1 in  $\text{DMSO-}d_6$ .

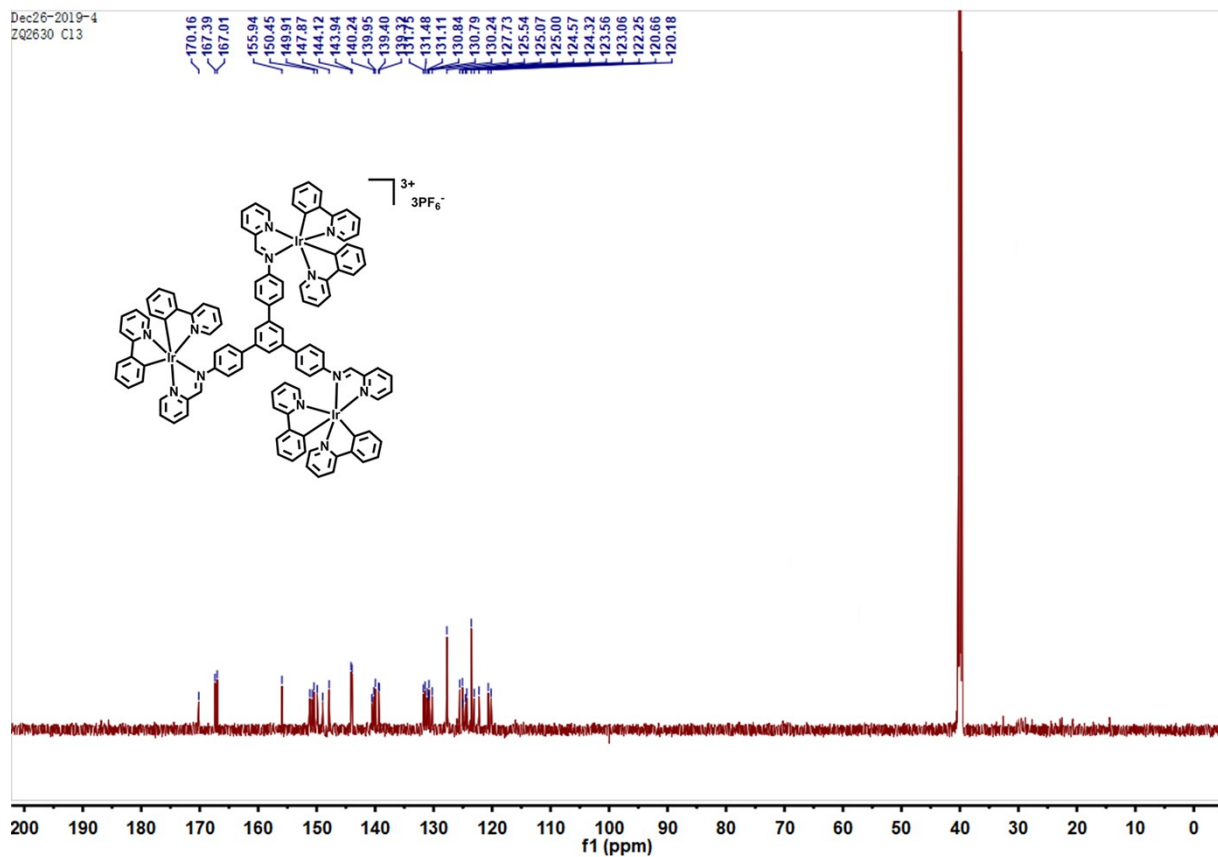

Fig. S6  $^{13}C$  NMR spectrum of **PS3** in  $DMSO-d_6$ .



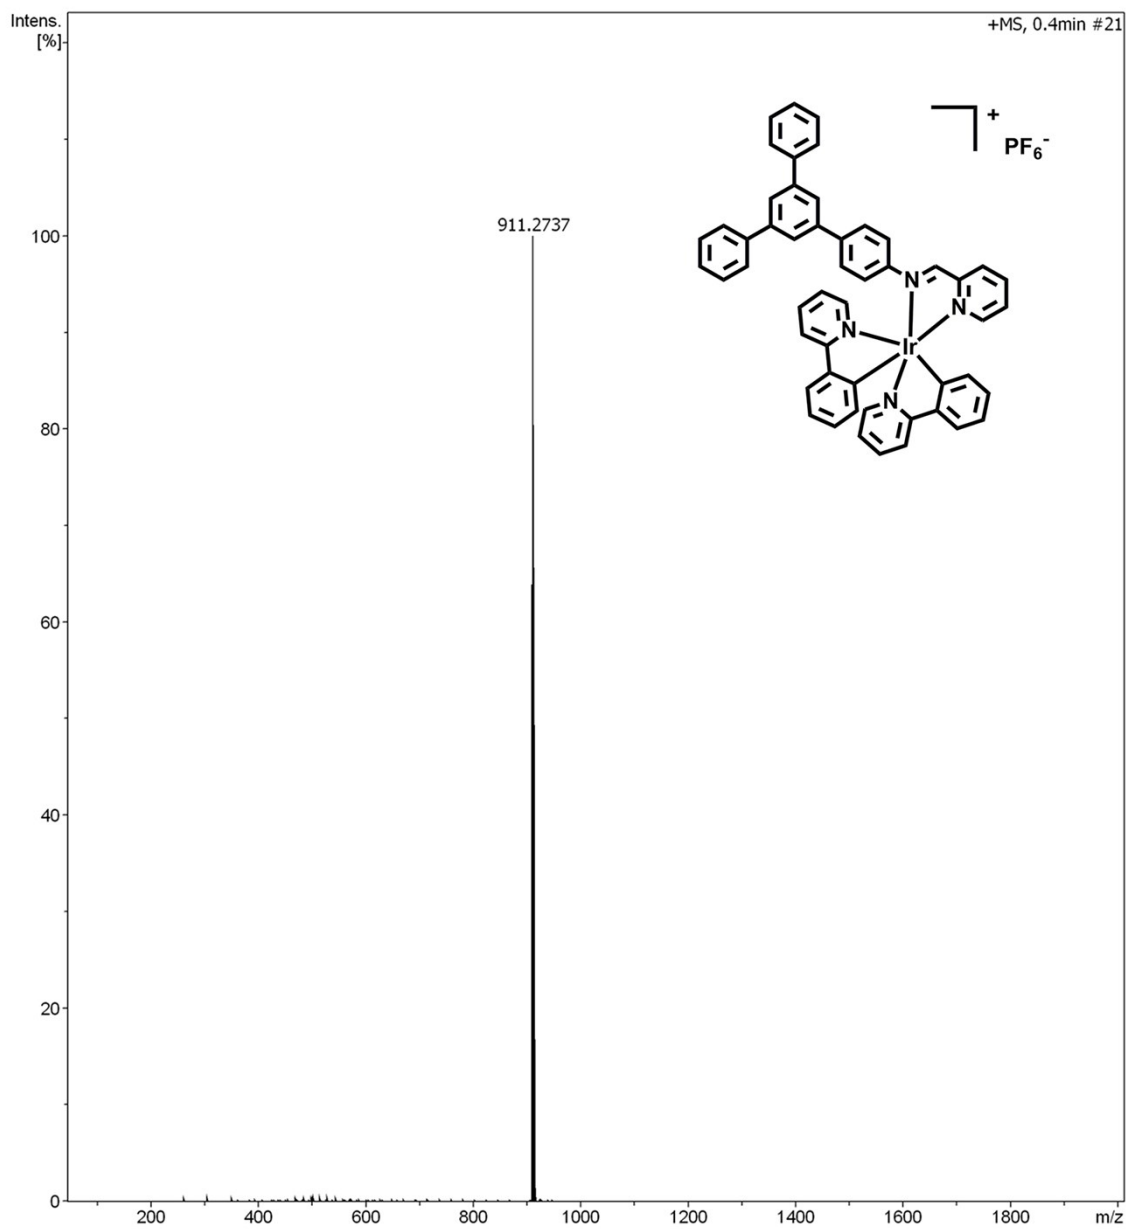

**Fig. S7** ESI mass spectrum of **PS1**.

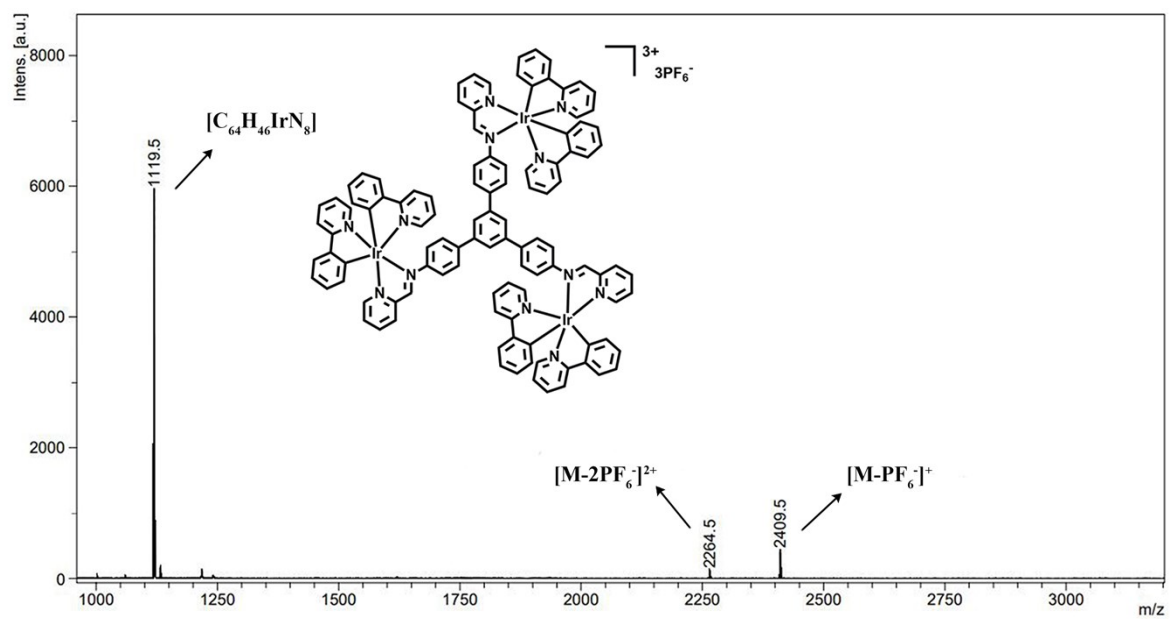

**Fig. S8** MALDI-TOF mass spectrum of PS3.

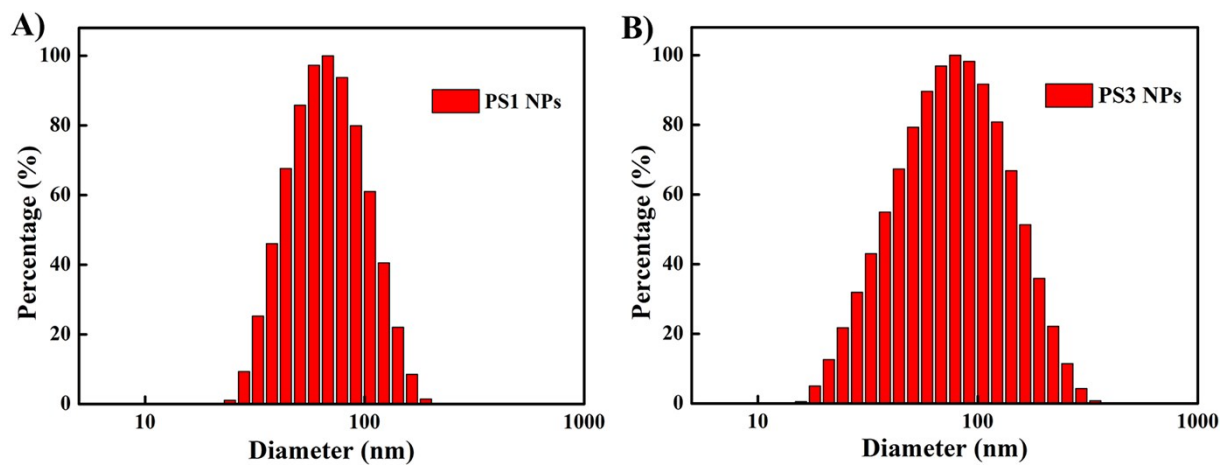

Fig. S9 DLS results of A) PS1 NPs and B) PS3 NPs in water at room temperature.

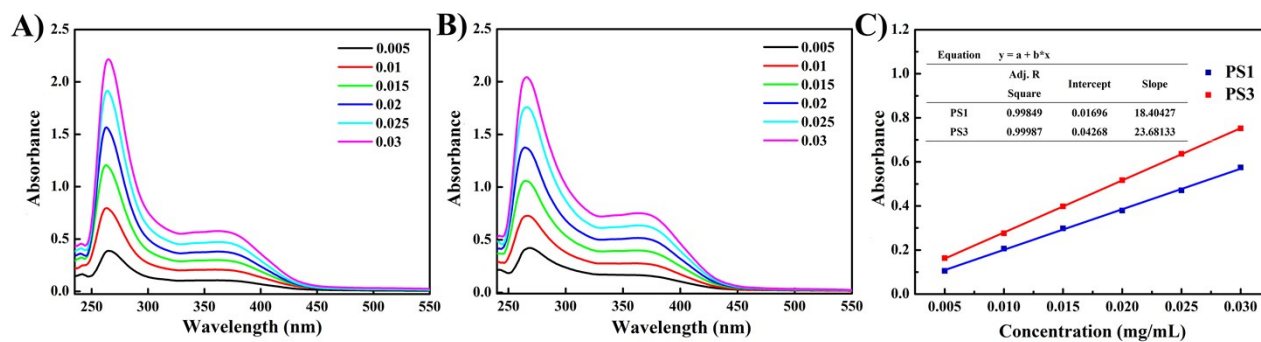

**Fig. S10** UV-vis absorption spectra of A) **PS1** and B) **PS3** at different concentration in DMSO/water (v/v) =4/1. C) Standard curves of **PS1** and **PS3** in DMSO/water (v/v) =4/1.

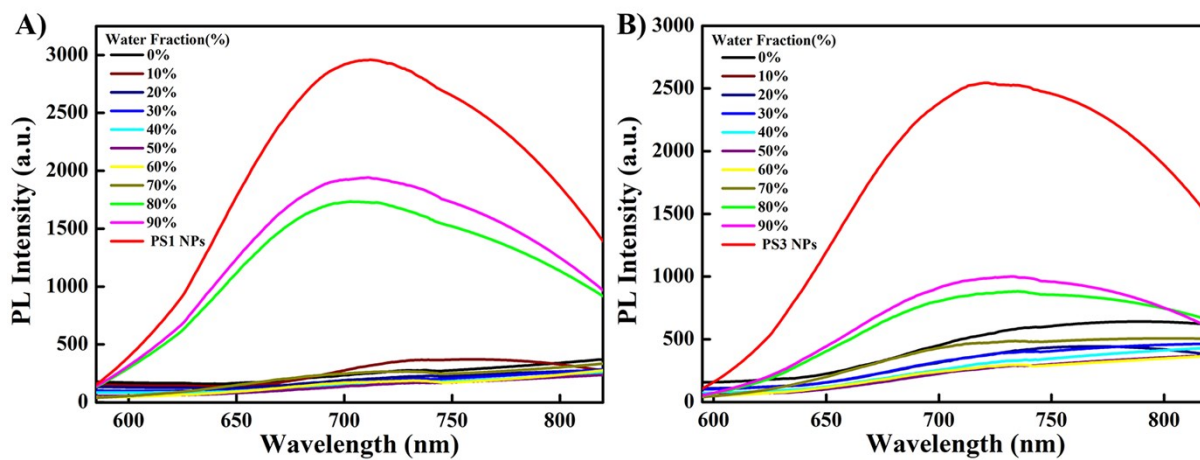

**Fig. S11** A) PL spectra of **PS1** NPs in water and **PS1** in DMSO/water mixtures with different water fractions at room temperature. B) PL spectra of **PS3** NPs in water and **PS3** in DMSO/water mixtures with different water fractions at room temperature. (**PS1** or **PS3** or **PS1** NPs or **PS3** NPs) =  $10^{-5}$  M

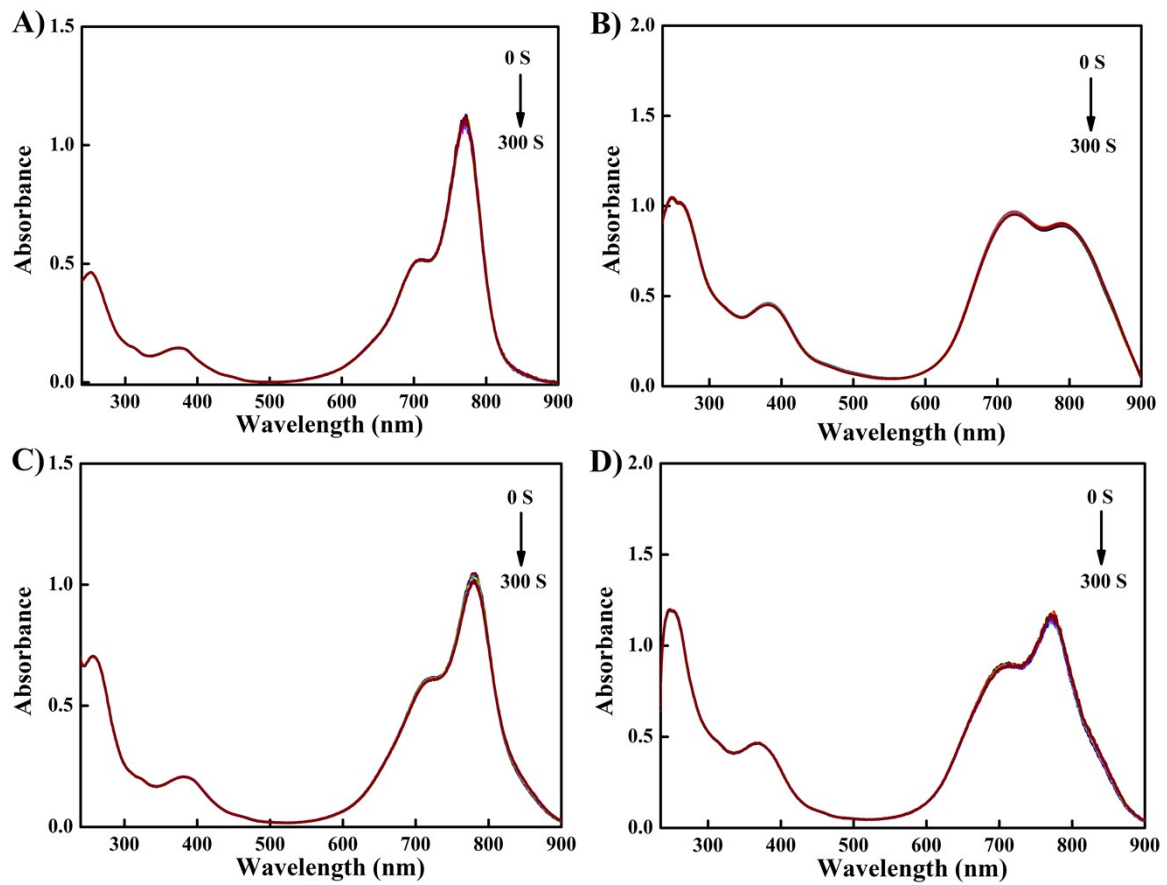

**Fig. S12** UV-vis absorption spectra of ICG ( $6.5 \times 10^{-6}$  M) in the presence of A) **PS1**, B) **PS3**, C) **PS1 NPs** and D) **PS3 NPs** ( $5 \times 10^{-6}$  M) at different times under dark. The time interval of UV recording = 30 s.

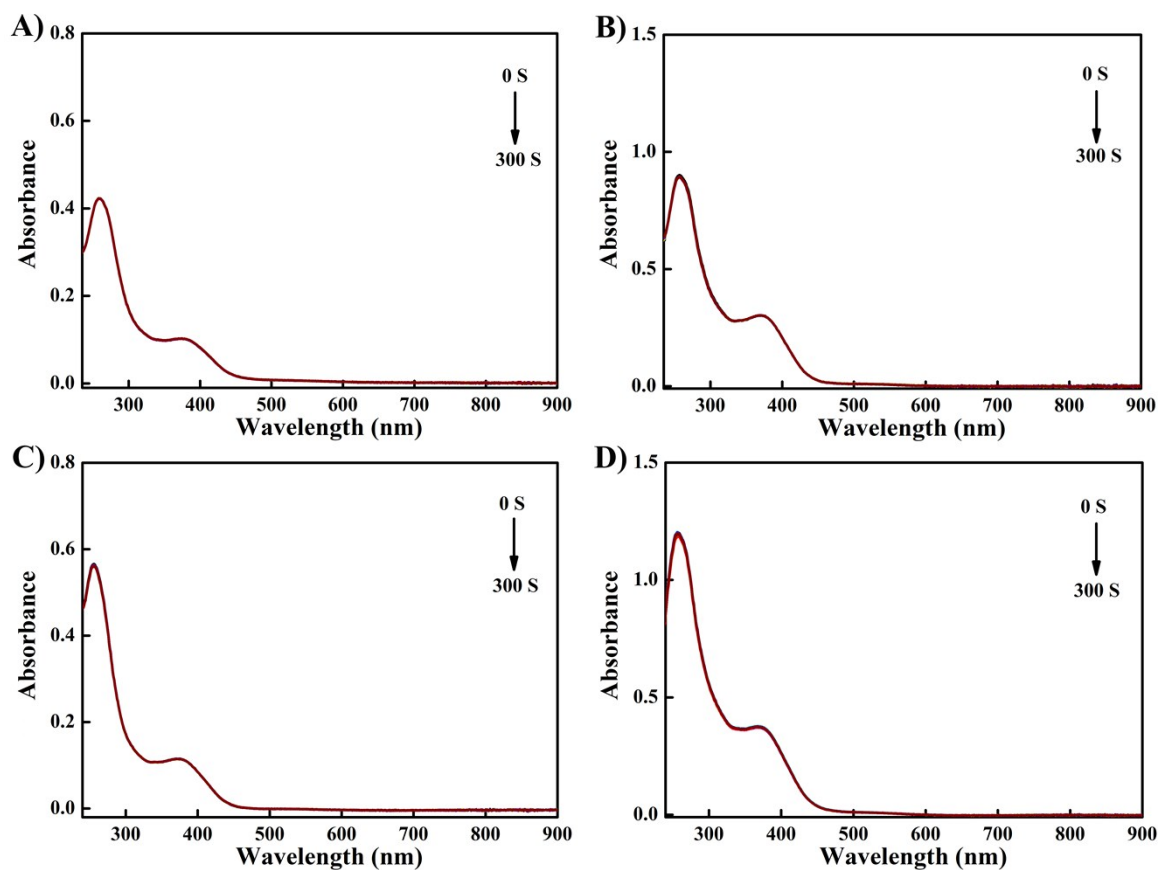

**Fig. S13** UV-vis absorption spectra of A) **PS1**, B) **PS3**, C) **PS1 NPs** and D) **PS3 NPs** ( $5 \times 10^{-6}$  M) at different times upon irradiation of a 450 nm LED at  $20 \text{ mW cm}^{-2}$  ( $0.6 \text{ J cm}^{-2}$ ). The time interval of UV recording = 30 s.

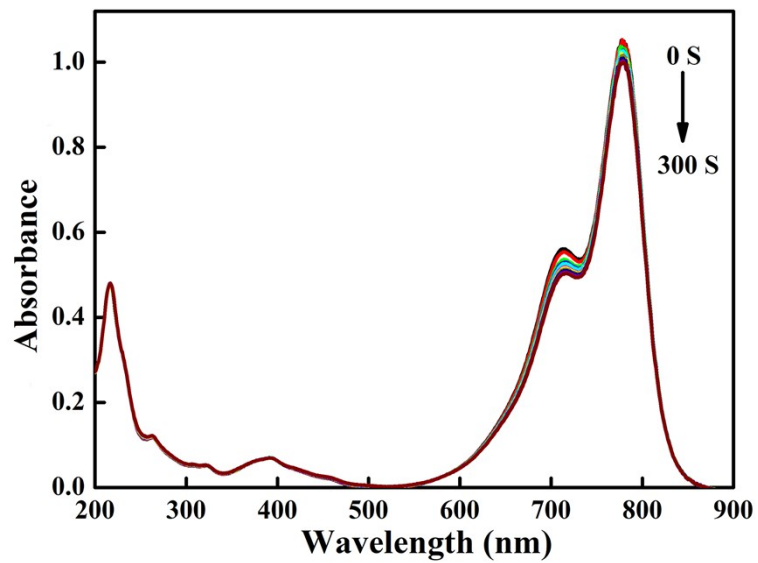

**Fig. S14** UV-vis absorption spectra of ICG ( $6.5 \times 10^{-6}$  M) at different times upon irradiation of a 450 nm LED at  $20 \text{ mW cm}^{-2}$  ( $0.6 \text{ J cm}^{-2}$ ). The time interval of UV recording = 30 s.



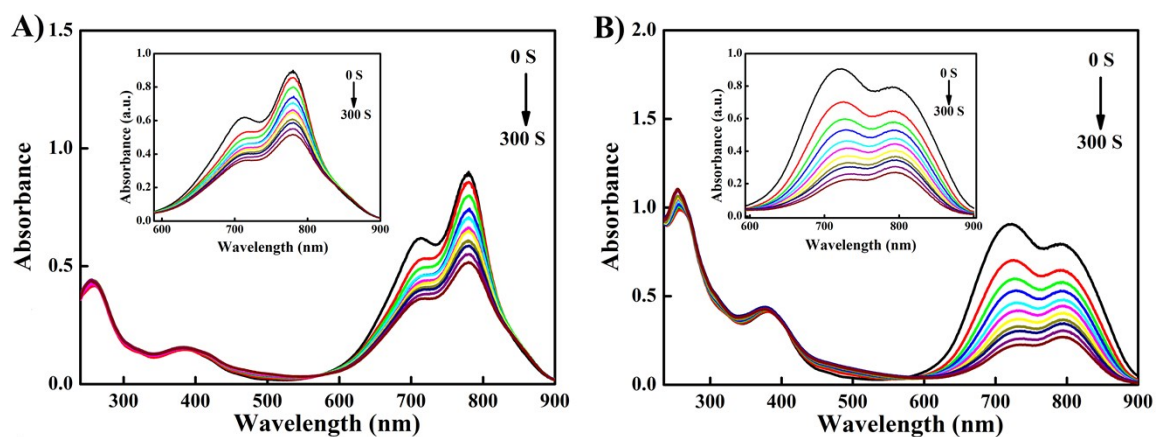

**Fig. S15** UV-vis absorption spectra of ICG ( $6.5 \times 10^{-6}$  M) in the presence of A) **PS1** and B) **PS3** ( $5 \times 10^{-6}$  M) at different times upon irradiation of a 450 nm LED at  $20 \text{ mW cm}^{-2}$  ( $0.6 \text{ J cm}^{-2}$ ). The time interval of UV recording = 30 s.

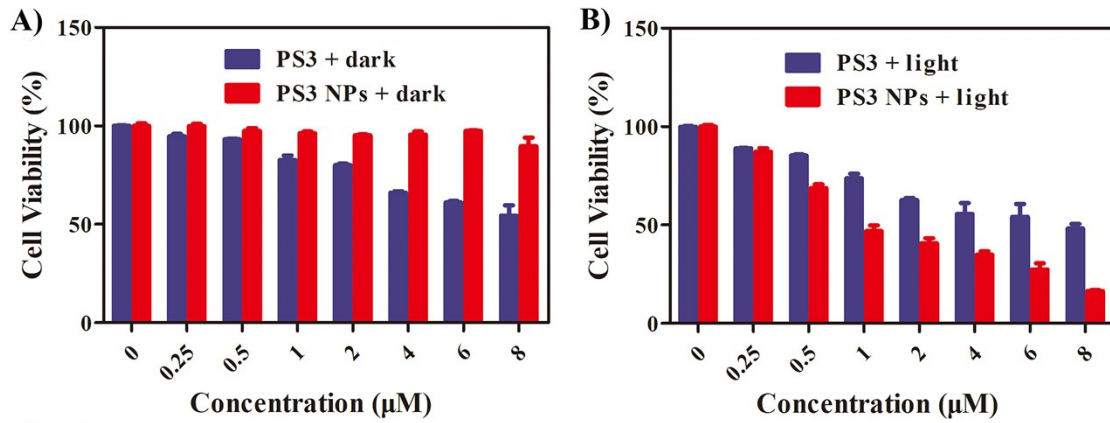

**Fig. S16** The viability of HeLa cells pretreated with **PS3** and **PS3 NPs** in the A) absence and B) presence of light. The cells were not washed before irradiation.

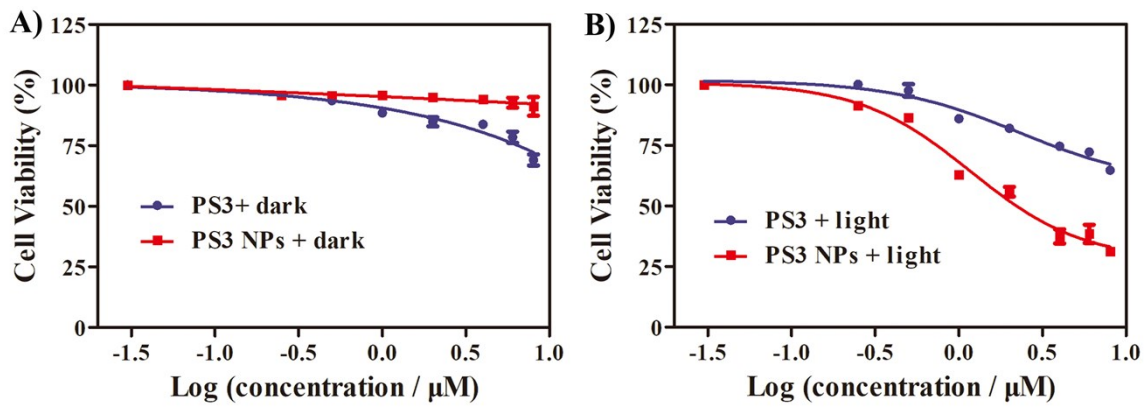

**Fig. S17** The cytotoxicity dose-response curves of **PS3** and **PS3 NPs** in HeLa cells A) under dark or B) light irradiation. The cells were washed before irradiation.

**Table S1.** The average diameter and polydispersity index (PDI) results of **PS1/PS3** NPs measured by DLS.

| Sample                | PS1 NPs | PS3 NPs |
|-----------------------|---------|---------|
| Average diameter (nm) | 73      | 87      |
| PDI                   | 0.128   | 0.186   |

**Table S2.** Photophysical data of **PS1, PS3** and their corresponding NPs.

|                               | $\lambda_{\text{abs}}$ (nm) | $\lambda_{\text{em}}$ (nm) | $\Phi_p$ (%) | $T_p$ (ns) |
|-------------------------------|-----------------------------|----------------------------|--------------|------------|
| <b>PS1</b> <sup>[a]</sup>     | 257; 378                    | 710                        | 6            | 53.57      |
| <b>PS3</b> <sup>[a]</sup>     | 260; 375                    | 730                        | 4            | 24.12      |
| <b>PS1 NPs</b> <sup>[b]</sup> | 257; 378                    | 710                        | 25           | 60.85      |
| <b>PS3 NPs</b> <sup>[b]</sup> | 260; 375                    | 730                        | 22           | 32.97      |

<sup>[a]</sup>Measured in DMSO/water (v/v = 1/9) at 298 K ( $1.0 \times 10^{-5}$  M,  $\lambda_{\text{ex}} = 380$  nm). <sup>[b]</sup>Measured in water at 298 K ( $1.0 \times 10^{-5}$  M,  $\lambda_{\text{ex}} = 380$  nm).
